# Supplementary material for: A TCBD-based AB2-type second-order nonlinear optical hyperbranched polymer prepared by a facile click-type postfunctionalization
Source: Royal Society of Chemistry journal article supplement (doi:10.1039/d0py00970a), 2020-01-01
Supplement: d0py00970a1.pdf [file d0py00970a1.pdf]

# A TCBD-based AB<sub>2</sub>-type Second-order Nonlinear Optical Hyperbranched Polymer Prepared by a Facile Click-type Postfunctionalization

Xiaobo Zang,<sup>a, b</sup> Hongtao Liu,<sup>a</sup> Qianqian Li,<sup>c</sup> Zhong'an Li<sup>a, b\*</sup> and Zhen Li<sup>c, d\*</sup>

<sup>a</sup> Key Laboratory for Material Chemistry of Energy Conversion and Storage, Ministry of Education, School of Chemistry and Chemical Engineering, Huazhong University of Science and Technology, Wuhan, 430074, P. R. China. E-mail: lizha@hust.edu.cn

<sup>b</sup> Shenzhen Institute of Huazhong University of Science and Technology, Shenzhen 518000, P. R. China

<sup>c</sup> Department of Chemistry, Sauvage Center for Molecular Sciences, Wuhan University, Wuhan, 430072, P. R. China. E-mail: lizhen@whu.edu.cn

<sup>d</sup> Institute of Molecular Aggregation Science, Tianjin University, Tianjin 300072, P. R. China.

**Table S1.** Elemental analysis results.<sup>a</sup>

| No.        | N[%]         | C[%]          | H[%]        |
|------------|--------------|---------------|-------------|
| <b>HP1</b> | 2.27 (2.57)  | 65.58 (74.84) | 4.27 (4.99) |
| <b>HP2</b> | 5.90 (7.99 ) | 63.56 (71.97) | 5.23 (6.33) |
| <b>HP3</b> | 6.24 (/)     | 61.21 (/)     | 5.30 (/)    |

<sup>a</sup> The theoretical EA values of **HP1** and **HP2** are listed in brackets for comparison, except **HP3** due to the uncertainty of the exact ratio of TCBD groups. Note: A large deviation between experimental and theoretical data has been obtained. Bases on the data of DSC measurements, we attribute the deviation to the occurring of the cross-linking for **HP1** at 132 °C, while at 190 °C for **HP2** and **HP3**, which would make the HPs more thermally stable and thus lead to a large deviation for EA results.

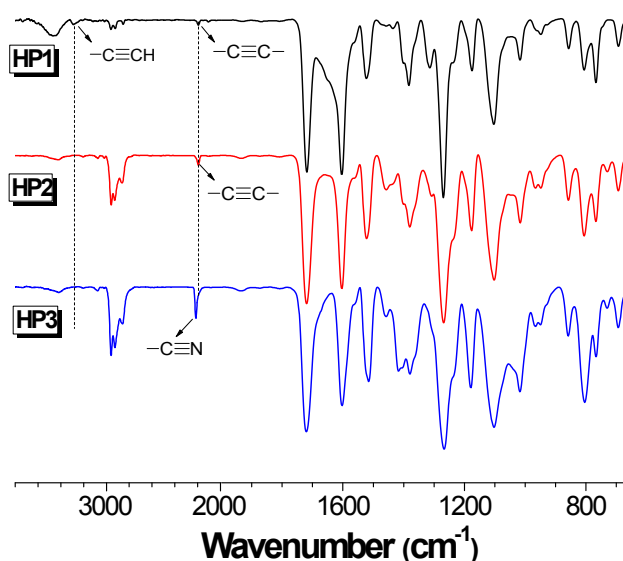

**Fig. S1** FT-IR spectra of **HP1-HP3**.

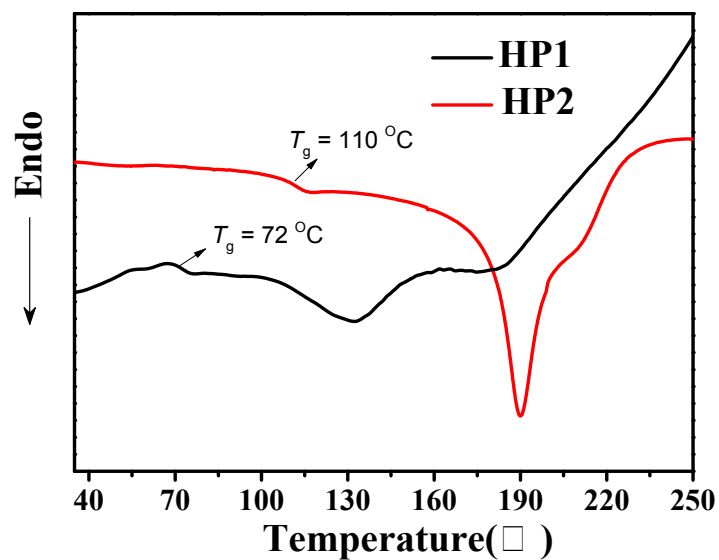

**Fig. S2** DSC curves of **HP1-HP2** measured under nitrogen at a heating rate of 10 °C/min.

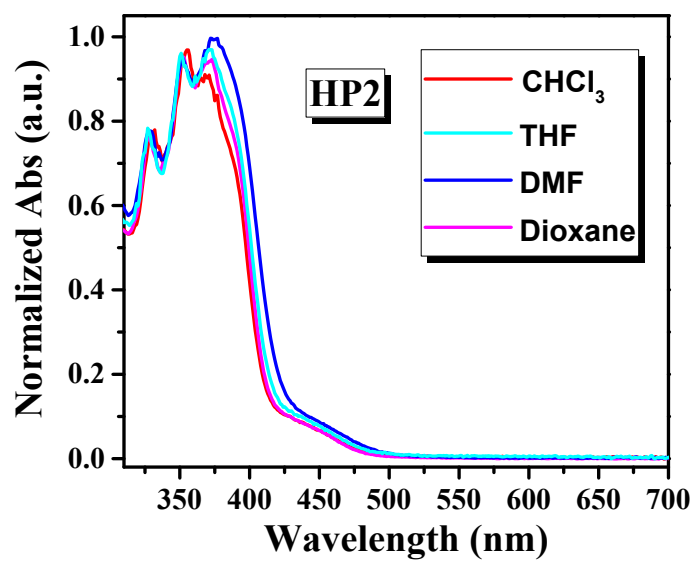

**Fig. S3** Solution absorption spectra of **HP2** in different solvents.

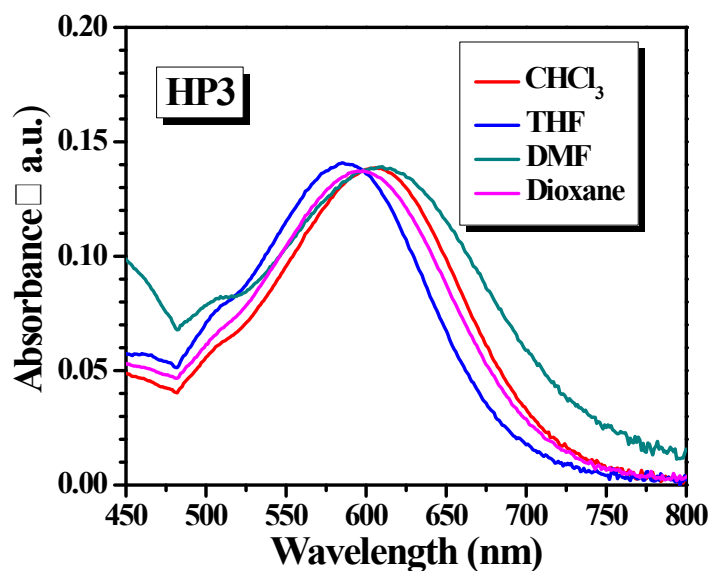

| Solvents               | THF    | Dioxane | CHCl <sub>3</sub> | DMF    |
|------------------------|--------|---------|-------------------|--------|
| $\lambda_{\text{max}}$ | 587 nm | 598 nm  | 608 nm            | 610 nm |

**Fig. S4** Solution absorption spectra of **HP3** in different solvents, with the absorption maxima listed in Table.

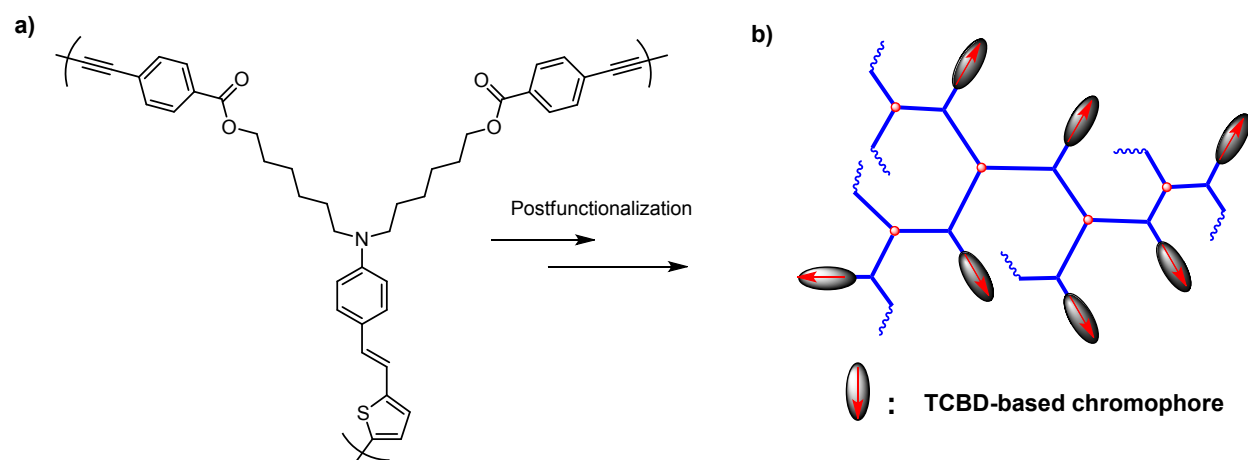

**Fig. S5.** Proposed two design strategies for improving the NLO effects of TCBD-based hyperbranched polymers.

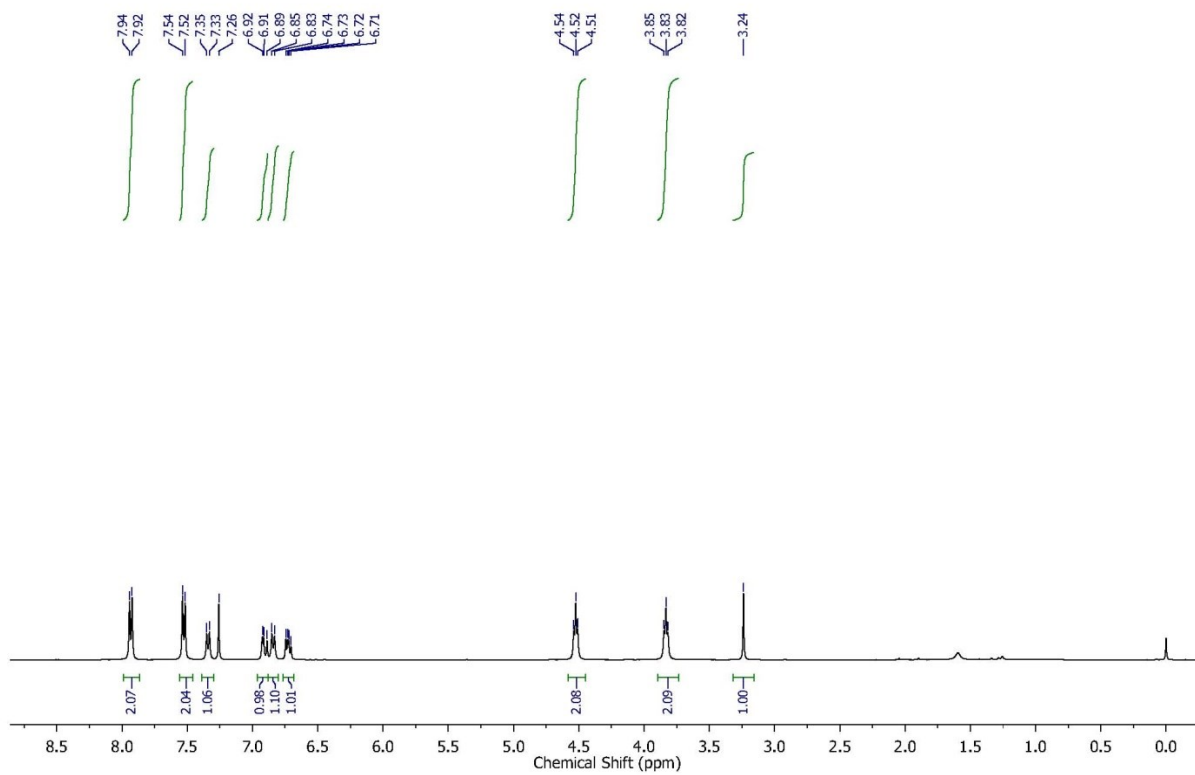

**Fig. S6** <sup>1</sup>H NMR spectrum of monomer **3** conducted in CDCl<sub>3</sub>.

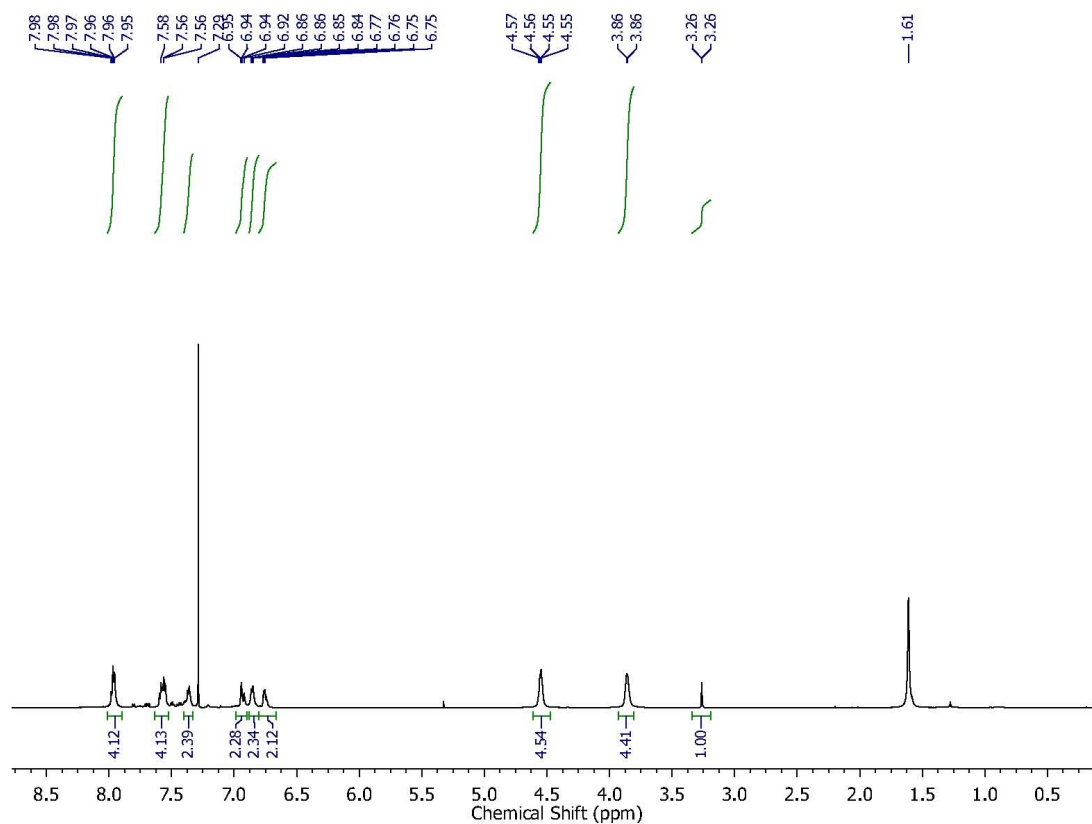

**Fig. S7** <sup>1</sup>H NMR spectrum of HP1 conducted in CDCl<sub>3</sub>.

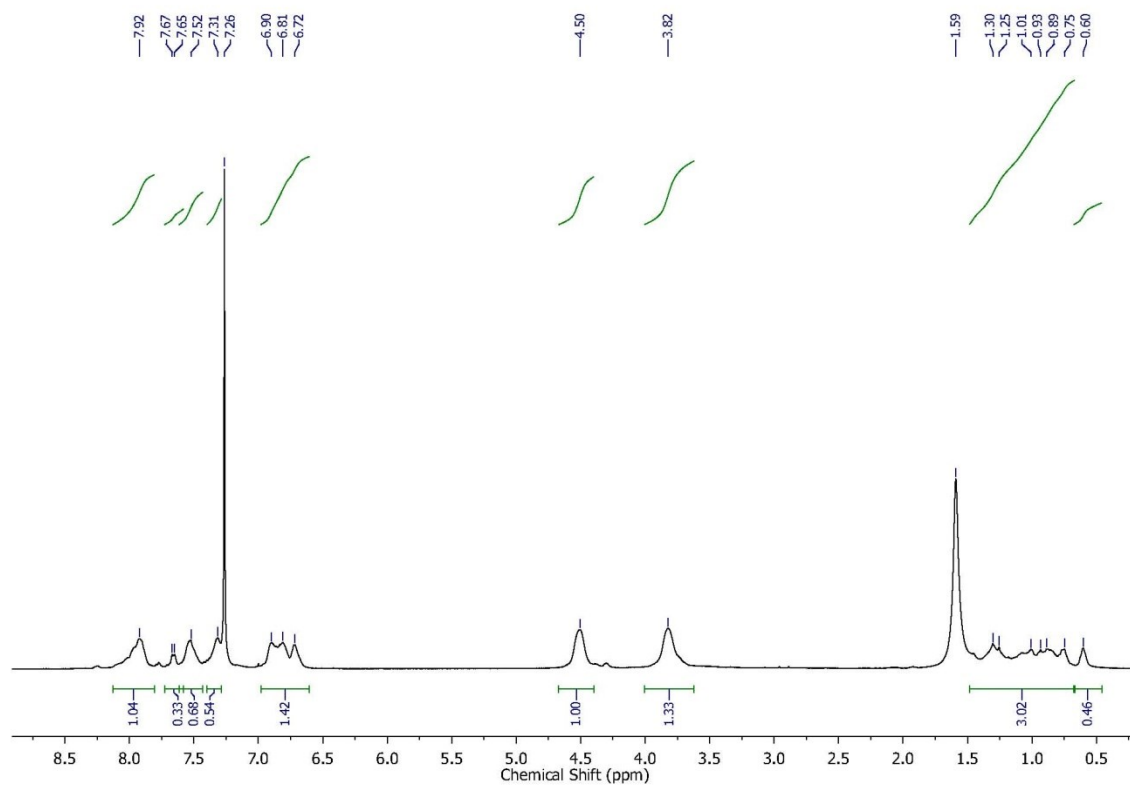

**Fig. S8**  $^1\text{H}$  NMR spectrum of **HP2** conducted in  $\text{CDCl}_3$ .

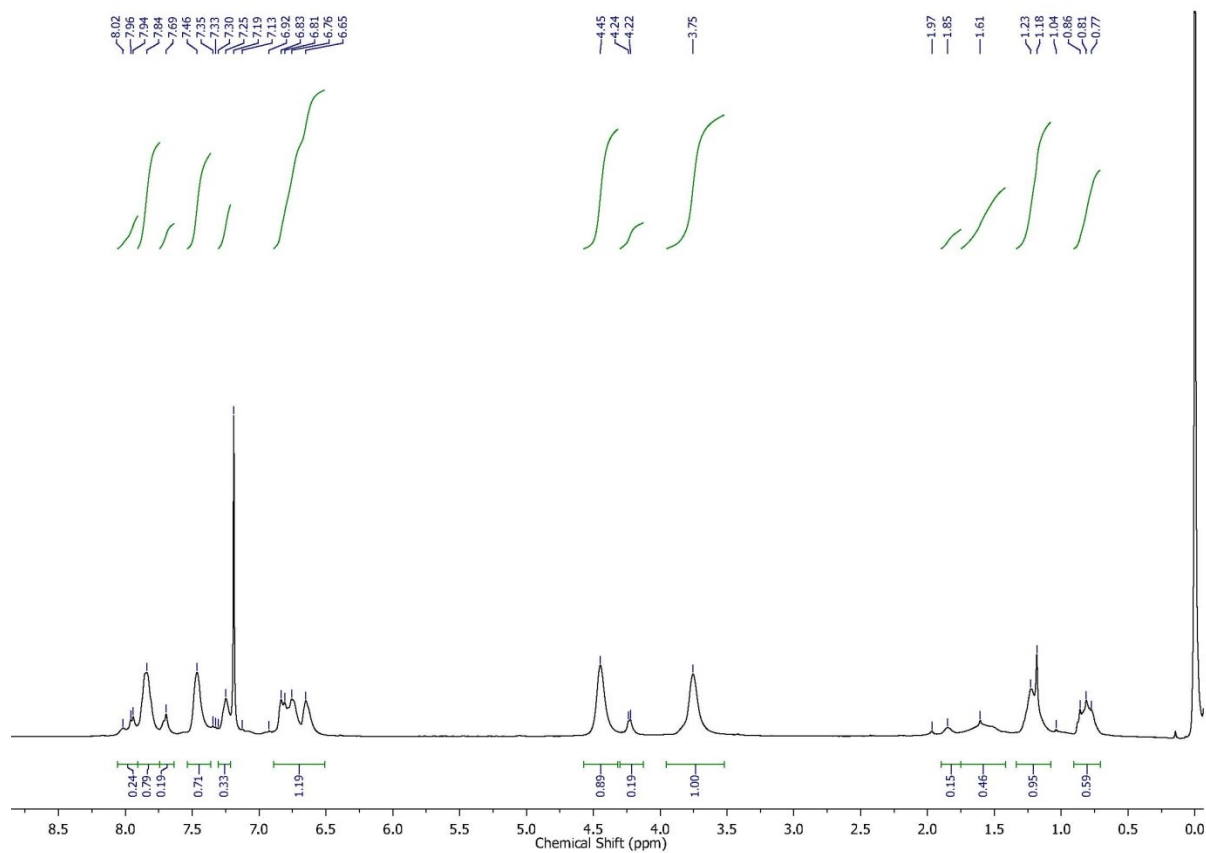

**Fig. S9**  $^1\text{H}$  NMR spectrum of **HP3** conducted in  $\text{CDCl}_3$ .

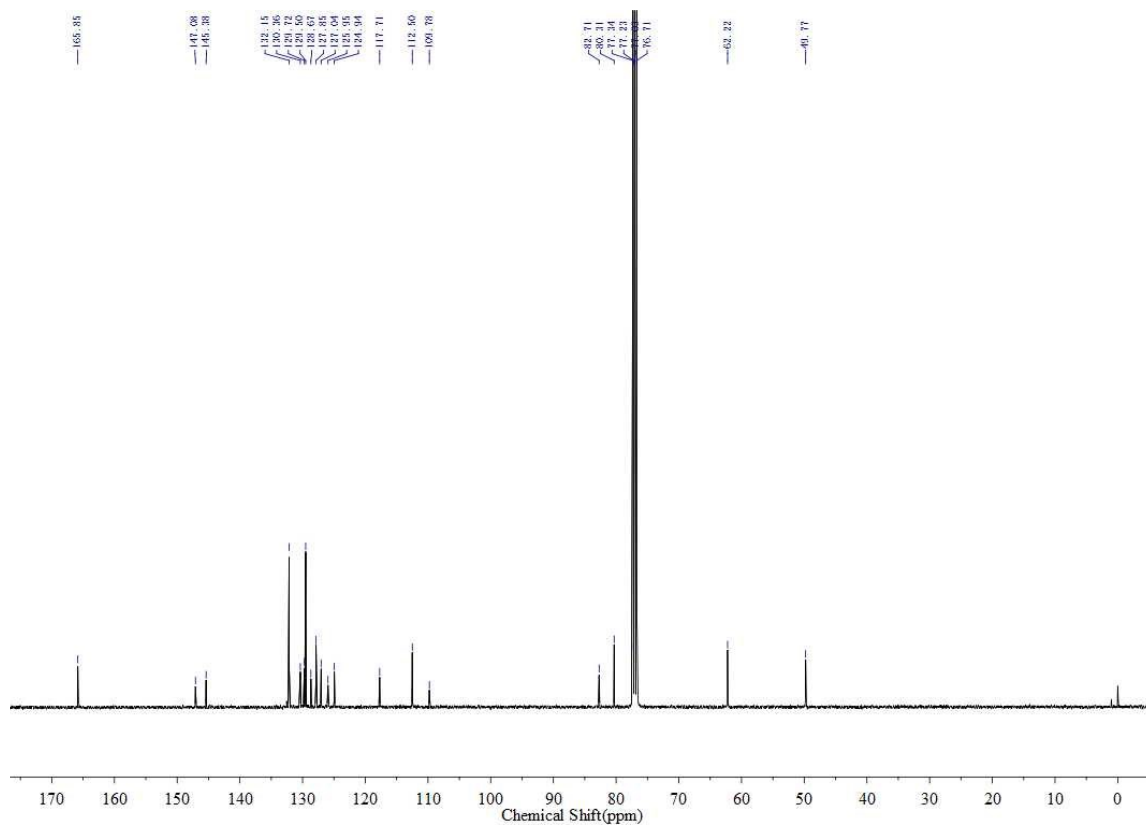

**Fig. S10.**  $^{13}\text{C}$  NMR spectrum of **HP1** conducted in  $\text{CDCl}_3$ .

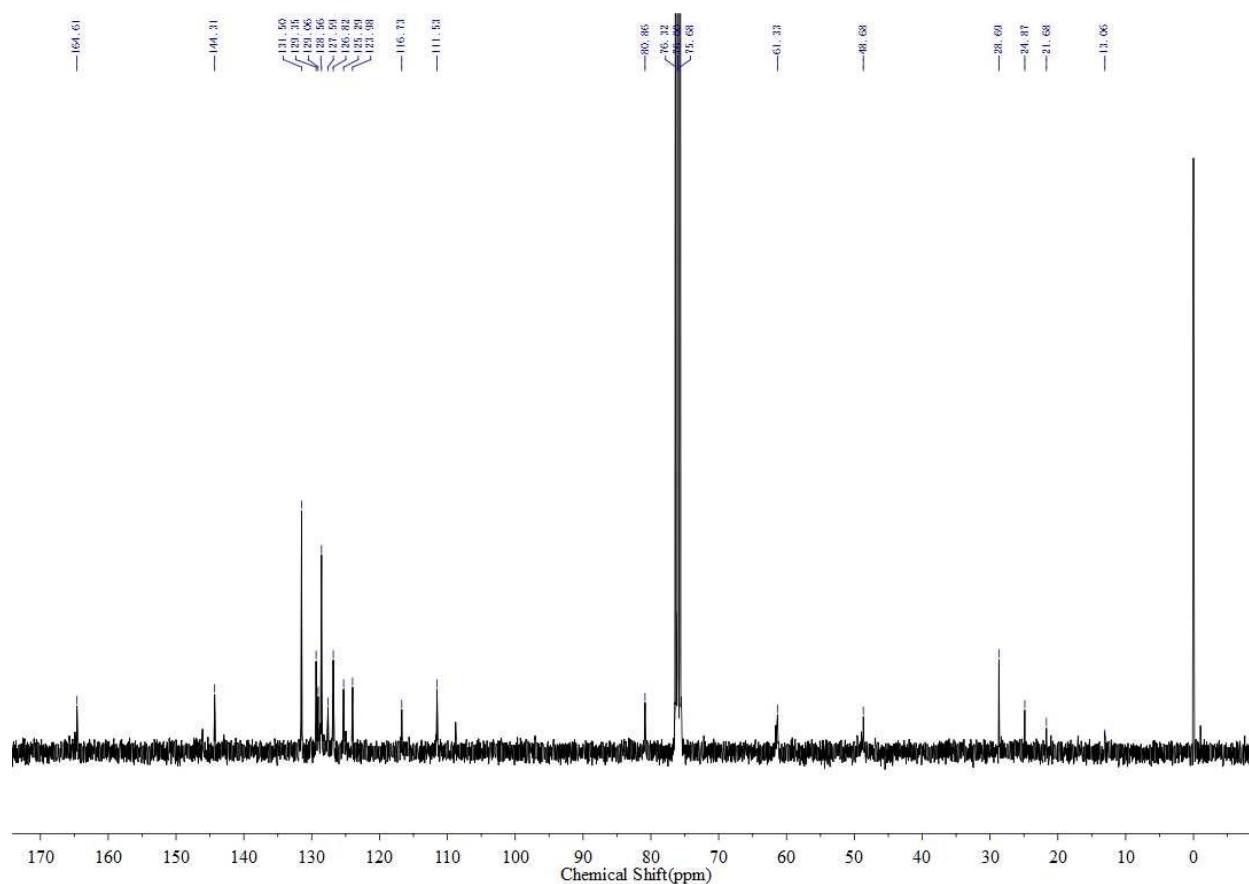

**Fig. S11.**  $^{13}\text{C}$  NMR spectrum of **HP2** conducted in  $\text{CDCl}_3$ .

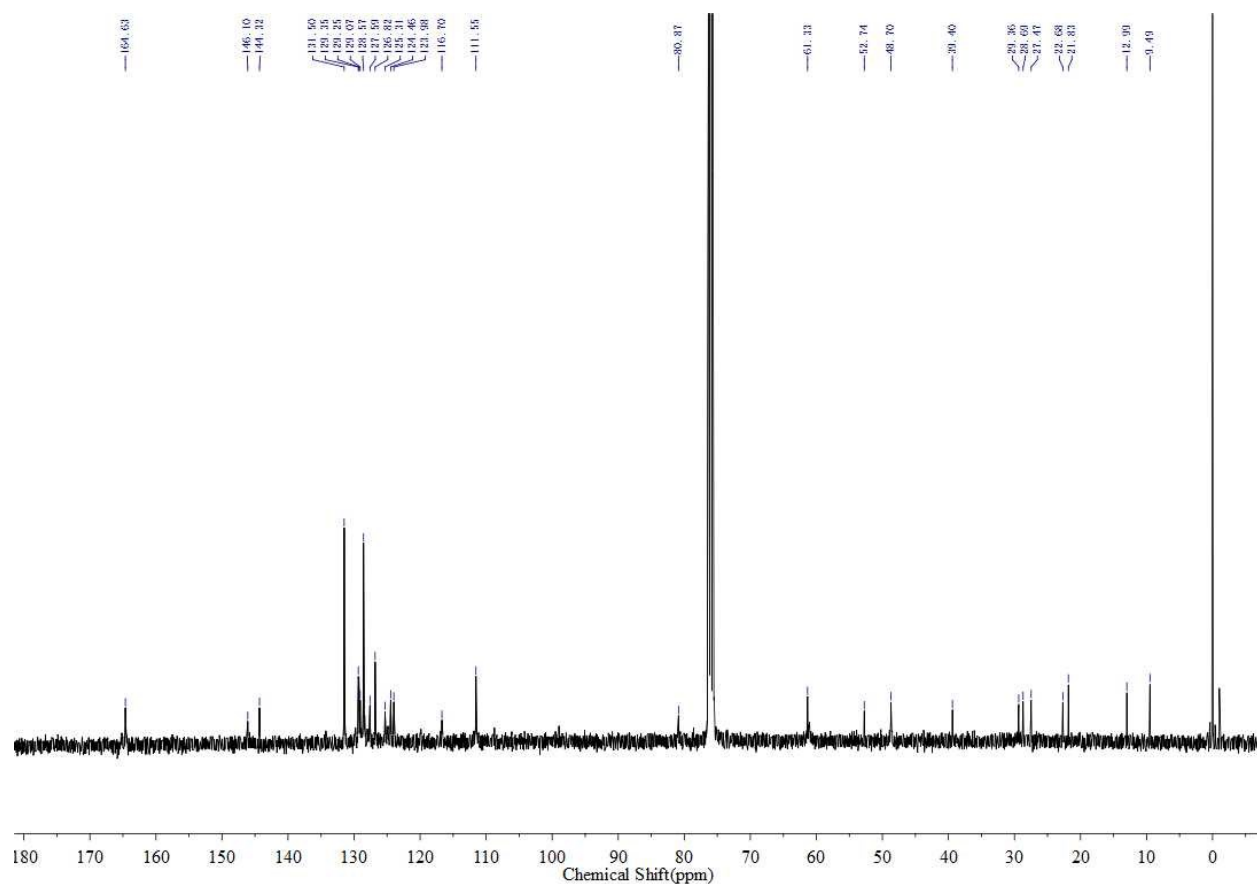

**Fig. S12.**  $^{13}\text{C}$  NMR spectrum of **HP3** conducted in  $\text{CDCl}_3$ .

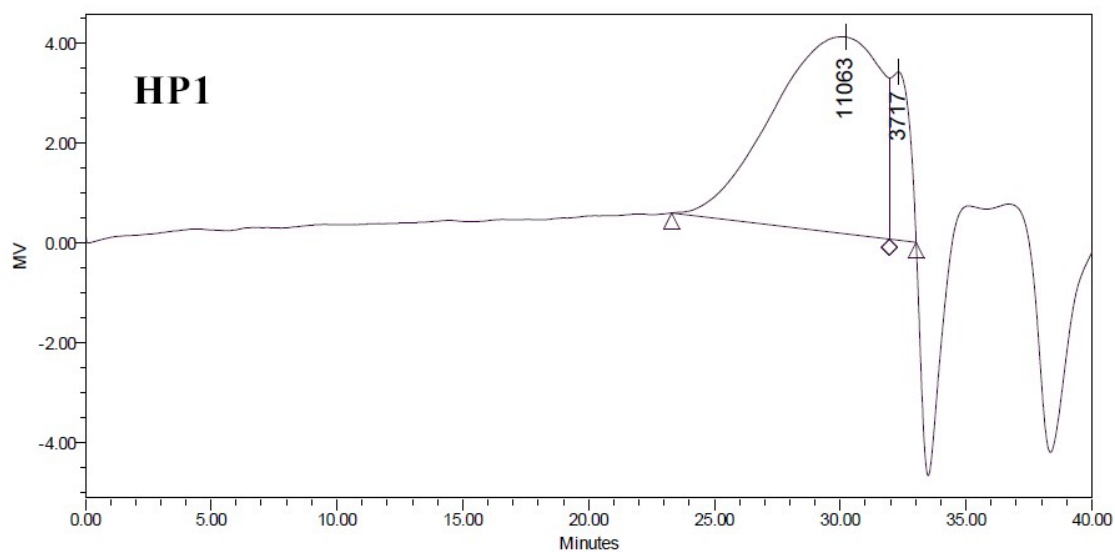

**Broad Unknown Modified Universal Peak Table**

|   | Distribution Name | Mv (Daltons) | K (dl/g) | alpha | Intrinsic Viscosity (dl/g) | Mn (Daltons) | Mw (Daltons) | MP (Daltons) | Mz (Daltons) | Mz+1 (Daltons) | Polydispersity | Mz/Mw    |
|---|-------------------|--------------|----------|-------|----------------------------|--------------|--------------|--------------|--------------|----------------|----------------|----------|
| 1 |                   |              |          |       |                            | 12962        | 22112        | 11063        | 38146        | 58197          | 1.705968       | 1.725086 |
| 2 |                   |              |          |       |                            |              |              | 3717         |              |                |                |          |

**Fig. S13.** GPC curve and data of **HP1**.

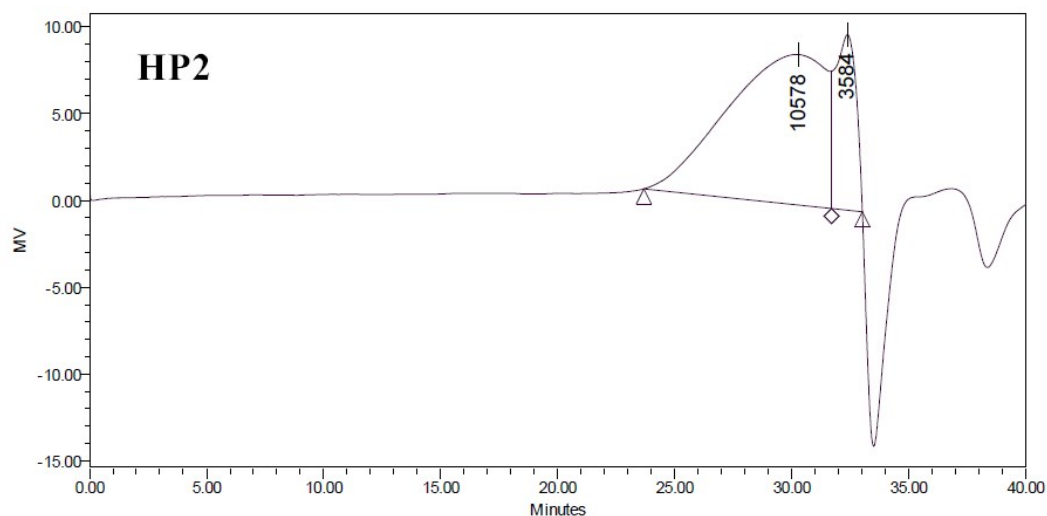

**Broad Unknown Modified Universal Peak Table**

|   | Distribution Name | Mv (Daltons) | K (dl/g) | alpha | Intrinsic Viscosity (dl/g) | Mn (Daltons) | Mw (Daltons) | MP (Daltons) | Mz (Daltons) | Mz+1 (Daltons) | Polydispersity | Mz/Mw    |
|---|-------------------|--------------|----------|-------|----------------------------|--------------|--------------|--------------|--------------|----------------|----------------|----------|
| 1 |                   |              |          |       |                            |              |              | 3584         |              |                |                |          |
| 2 |                   |              |          |       |                            | 14128        | 23746        | 10578        | 40050        | 58621          | 1.680735       | 1.686634 |

**Fig. S14. GPC curve and data of HP2.**

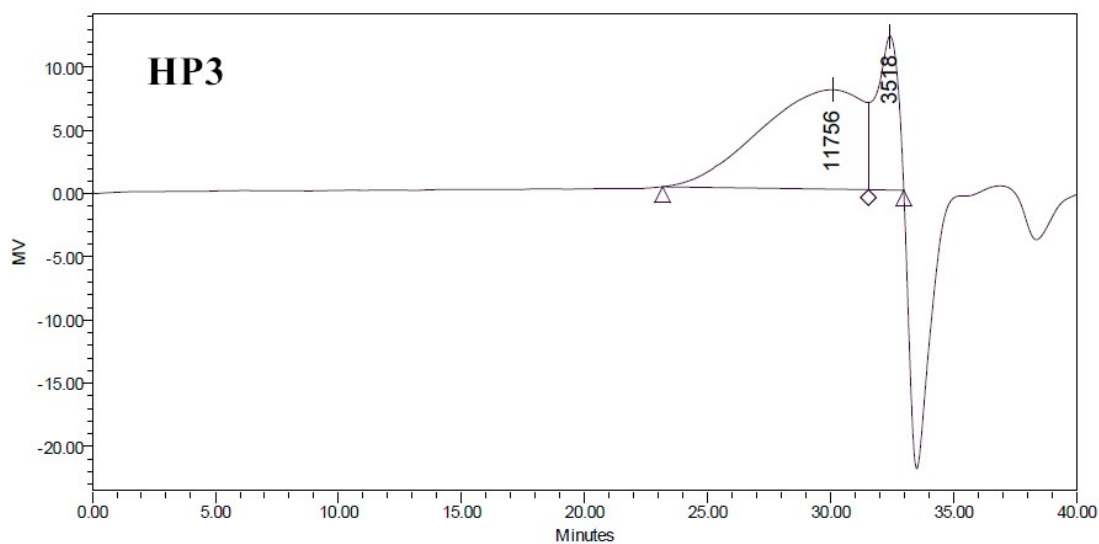

**Broad Unknown Modified Universal Peak Table**

|   | Distribution Name | Mv (Daltons) | K (dl/g) | alpha | Intrinsic Viscosity (dl/g) | Mn (Daltons) | Mw (Daltons) | MP (Daltons) | Mz (Daltons) | Mz+1 (Daltons) | Polydispersity | Mz/Mw    |
|---|-------------------|--------------|----------|-------|----------------------------|--------------|--------------|--------------|--------------|----------------|----------------|----------|
| 1 |                   |              |          |       |                            | 15240        | 25330        | 11756        | 43440        | 66150          | 1.662149       | 1.714945 |
| 2 |                   |              |          |       |                            |              |              | 3518         |              |                |                |          |

**Fig. S15. GPC curve and data of HP3.**

## Mass Spectrum List Report

### Analysis Info

Analysis Name D:\Data\Lizhongan\li-zangxiaobo20190710-1.d  
Method tune\_low\_20170906\_50-1200.m  
Sample Name li-zangxiaobo20190710-1  
Comment

Acquisition Date 7/10/2019 10:52:20 AM

Operator BDAL@DE  
Instrument / Ser# micrOTOF 10401

### Acquisition Parameter

|             |          |                      |          |                  |           |
|-------------|----------|----------------------|----------|------------------|-----------|
| Source Type | ESI      | Ion Polarity         | Positive | Set Nebulizer    | 0.3 Bar   |
| Focus       | Active   |                      |          | Set Dry Heater   | 200 °C    |
| Scan Begin  | 50 m/z   | Set Capillary        | 4000 V   | Set Dry Gas      | 4.0 l/min |
| Scan End    | 1200 m/z | Set End Plate Offset | -500 V   | Set Divert Valve | Waste     |

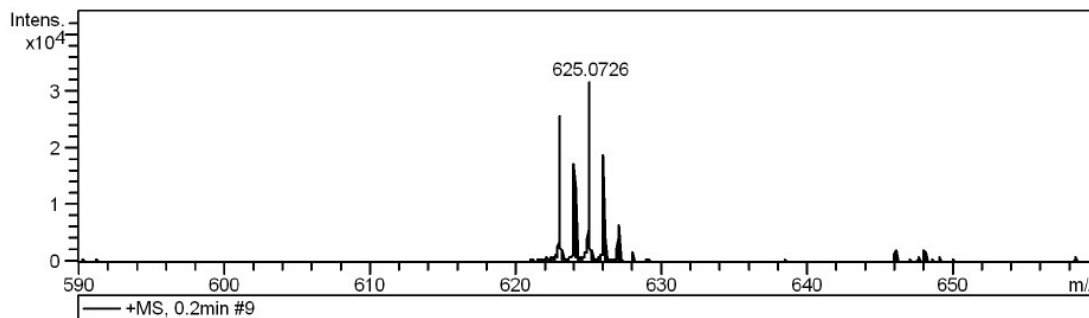

| # | m/z      | Res.  | S/N   | I     | FWHM   |
|---|----------|-------|-------|-------|--------|
| 1 | 623.0726 | 10188 | 204.0 | 25590 | 0.0612 |
| 2 | 624.0777 | 9805  | 135.7 | 17036 | 0.0636 |
| 3 | 625.0726 | 10566 | 252.2 | 31742 | 0.0592 |
| 4 | 626.0754 | 10675 | 148.0 | 18636 | 0.0586 |
| 5 | 627.0781 | 10532 | 51.3  | 6462  | 0.0595 |
| 6 | 628.0778 | 10744 | 12.7  | 1605  | 0.0585 |

**Fig. S16.** HR-mass spectrum of monomer **3**.
